# Supplementary material for: Regeneration of NCM622 from end-of-life lithium-ion battery cathode materials
Source: Royal Society of Chemistry journal article supplement (doi:10.1039/d2ra06937g), 2023-01-01
Supplement: d2ra06937g1.pdf [file d2ra06937g1.pdf]

## Regeneration of NCM622 from end-of-life lithium-ion batteries cathode materials

Shuai Gu<sup>a,b,\*</sup>, Ting He<sup>a,b</sup>, Jiao Kong<sup>a,b</sup>, Tongtong Fu<sup>c</sup>, Zirui Guo<sup>c</sup>, Jingzhi Cui<sup>c</sup>, Zhihao Chen<sup>c</sup>

<sup>a</sup> National Engineering Research Center for Integrated Utilization of Salt Lake Resources, East China University of Science and Technology, Shanghai, 200237, China

<sup>b</sup> Joint International Laboratory for Potassium and Lithium Strategic Resources, East China University of Science and Technology, Shanghai, 200237, China

<sup>c</sup> School of Chemical Engineering, East China University of Science and Technology, Shanghai 200237, China

\*Corresponding contributor. E-mail: [gushuai@ecust.edu.cn](mailto:gushuai@ecust.edu.cn)

### Contents

**Table S1** XRF and EDX analysis of EOL cathode material.

**Table S2** Leaching efficiency results of Li (a), Co (b), Ni (c), and Mn (d) with various acids ratios at 40 min and 10 g/L solid-liquid ratio.

**Table S3** The amount of VC required to treat 2 kg of spent lithium-ion batteries.

**Table S4** Leaching efficiencies and EDX analysis of the leached cathode material.

**Table S5** XPS parameters obtained from the leached spent cathode materials.

**Table S6** Variation of metal concentration in recovery process.

**Table S7** A comprehensive summary of the kinetic models.

**Table S8** Regression parameters of Li, Co, Ni, and Mn.

**Table S9** Lattice structure parameters of the NCM622 cathode material.

**Figure S1** EOL LIBs (a), cathode (b), and recovered cathode powders (c) from EOL LIBs.

**Figure S2** Leaching kinetics of Co at 30 °C and 10 g/L solid-liquid ratio at 11 min (a), 20 min (b), 30 min (c), and 40 min (d) with various mixed acids ratios.

**Figure S3** Correlation and significance between mixed acids ratios and leaching efficiencies (a), Eh-pH diagram measured during the leaching process with 0.5 M HCl, 0.25 M HNO<sub>3</sub>, and 0.25 M HCl at 30 °C and 10 g/L solid-liquid ratio (b).

**Figure S4** Leaching kinetics of strategic metals at 30 °C (a), 50 °C (b), 70 °C (c), and 90 °C (d) at 10 g/L solid-liquid ratio, 0.5 M HCl, 0.25 M HNO<sub>3</sub> and 0.25 M VC.

**Figure S5** SEM (a) and EDX (b) images of the leached residual at 90 °C with optimal acids ratios.

**Figure S6** XPS survey of the leached residual at 30 °C (a) and the deconvoluted high-resolution XPS curves of Co (b), O (c), and Al (d).

**Figure S7** Thermodynamic calculations of Ni-containing (a) and Mn-containing (b) species at 30 °C.

**Figure S8** Reactions of DHA hydrate to form Bi-DHA.

**Figure S9** Thermodynamic calculated species distributions of mixed acids system at 30 °C (a), 50 °C (b), 70 °C (c) and 90 °C (d).

**Figure S10** UV-vis spectrum of mixed acids at 0 min (a), 1~40 min (b), and deconvoluted absorbance curves at 1 min (c) and 40 min (d).

**Figure S11** Deconvoluted UV-vis absorbance in mixed acids system at 5 min (a), 7 min (b), 11 min (c), and 20 min (d).

**Figure S12** SEM (c), and EDX (d) images of the as-recovered NCM622 precursor.

## Materials

All spent LIBs cathode materials utilized in this study were dismantled from spent mobile phone batteries purchased from Alibaba Group Holding Ltd. Hydrochloric acid (HCl, AR, 35 ~ 38%, Sinopharm Chemical Reagent Co., Ltd.), nitric acid (HNO<sub>3</sub>, AR, 65 ~ 68%) and L-ascorbic acid (C<sub>6</sub>H<sub>8</sub>O<sub>6</sub>, AR, purity > 99.0%) were dissolved/diluted before use. Ammonium hydroxide aqueous solution (NH<sub>3</sub>H<sub>2</sub>O, CP, 25 ~ 28%) is used to adjust the pH of the effluent. Sodium carbonate (Na<sub>2</sub>CO<sub>3</sub>, CP, purity ≥99.8%) for precipitation of NCM622 precursor and Li<sub>2</sub>CO<sub>3</sub>. Lithium carbonate (Li<sub>2</sub>CO<sub>3</sub>, 4N, purity > 99.5%) for precipitation of NCM622 precursor. And the recovered Li<sub>2</sub>CO<sub>3</sub> can be utilized in the manufacturing of NCM 622 cathode material. All electrochemical properties tests were performed in an electrochemical workstation (CorrTest, CS310M). Inductively coupled plasma-optical emission spectrometry (ICP-OES, FHS12, Spectro Arcos) was utilized to measure the concentration of metal ions.

**Table S1** XRF and EDX analysis of EOL cathode material.

| XRF    | Co <sub>3</sub> O <sub>4</sub> | NiO   | MnO  | F     | Al <sub>2</sub> O <sub>3</sub> |      |
|--------|--------------------------------|-------|------|-------|--------------------------------|------|
| wt%    | 76.63                          | 10.54 | 7.91 | 3.88  | 1.04                           |      |
| StdErr | 0.17                           | 0.07  | 0.10 | 0.39  | 0.07                           |      |
| EDX    | Co                             | Ni    | Mn   | F     | Al                             | O    |
| wt%    | 56.6                           | 4.28  | 3.34 | 0.882 | 0.698                          | 34.2 |

**Table S2** Leaching efficiency results of Li (a), Co (b), Ni (c), and Mn (d) with various acids ratios at 40 min and 10 g/L solid-liquid ratio.

| Various acids ratios/M |                  |      | Leaching efficiency results/% |       |       |       |
|------------------------|------------------|------|-------------------------------|-------|-------|-------|
| HCl                    | HNO <sub>3</sub> | VC   | Li                            | Co    | Ni    | Mn    |
| 0                      | 0                | 1    | 98.00                         | 96.69 | 99.57 | 99.90 |
| 0                      | 1                | 0    | 61.35                         | 10.40 | 58.84 | 15.36 |
| 0.25                   | 0.25             | 0.5  | 99.50                         | 95.60 | 98.10 | 98.80 |
| 0.25                   | 0.5              | 0.25 | 99.78                         | 98.10 | 99.23 | 99.83 |
| 0.5                    | 0.25             | 0.25 | 99.82                         | 99.89 | 99.40 | 99.92 |
| 1                      | 0                | 0    | 93.43                         | 66.73 | 95.97 | 80.70 |

The introduction of ascorbic acid for the recycling of waste cathode material has already been reported due to its acidity and reducibility. However, ascorbic acid is a very expensive reducing agent, the extensive use will undoubtedly increase operating costs. In this paper, the amount of VC required to treat 2 kg of spent lithium-ion batteries is calculated.

**Table S3** The amount of VC required to treat 2 kg of spent lithium-ion batteries

| Acid solution | Cathode active material/kg | VC/kg  |
|---------------|----------------------------|--------|
| ascorbic acid | 0.7                        | 11.848 |
| mixing acids  | 0.7                        | 2.962  |

**Table S4** Leaching efficiencies and EDX analysis of the leached cathode material.

| ICP-OES | Co    | Ni    | Mn    | Li    | Al    |      |       |
|---------|-------|-------|-------|-------|-------|------|-------|
| LR(%)   | 99.98 | 99.98 | 99.99 | 99.99 | 87.15 |      |       |
| EDX     | Co    | Ni    | Mn    | F     | Al    | C    | O     |
| wt%     | --    | --    | --    | 5.24  | 52.63 | 5.65 | 36.48 |

**Table S5** XPS parameters obtained from the leached spent cathode materials.

| Line designation     | Composition                                 | FWHM (eV) | Area (cps•eV) | $E_b$ (eV) |
|----------------------|---------------------------------------------|-----------|---------------|------------|
| Al 2p                | Al <sub>2</sub> O <sub>3</sub> <sup>1</sup> | 3.4       | 2154.6        | 71.1       |
| Al 2p <sub>3/2</sub> | Al <sub>2</sub> O <sub>3</sub> <sup>2</sup> | 1.6       | 12028.8       | 74.1       |
| Co 2p <sub>3/2</sub> | Co <sub>3</sub> O <sub>4</sub> <sup>3</sup> | 1.6       | 50528.4       | 779.3      |
| Co 2p <sub>3/2</sub> | CoO <sup>4</sup>                            | 3.0       | 95148.5       | 780.3      |
| Co 2p <sub>1/2</sub> | Co <sub>3</sub> O <sub>4</sub> <sup>5</sup> | 1.4       | 16656.5       | 794.6      |
| Co 2p <sub>1/2</sub> | Co <sub>3</sub> O <sub>4</sub> <sup>6</sup> | 2.8       | 40665.5       | 795.9      |
| O 1s                 | Co <sub>3</sub> O <sub>4</sub> <sup>5</sup> | 1.3       | 58883         | 529.35     |
| O 1s                 | CoO <sup>7</sup>                            | 2.0       | 49892         | 530.4      |
| O 1s                 | Al <sub>2</sub> O <sub>3</sub> <sup>8</sup> | 2.9       | 91879         | 531.15     |

When Al(OH)<sub>3</sub>, NCM622 precursor and Li<sub>2</sub>CO<sub>3</sub> precipitate, there was a certain capacity loss of Li. Among them, the loss of precipitated Al(OH)<sub>3</sub> is about 1% -3%, the loss of precipitated NCM622 precursor is about 3% -5%, and the loss of precipitated Li<sub>2</sub>CO<sub>3</sub> is about 6% -10%. And the recovered Li<sub>2</sub>CO<sub>3</sub> can be utilized for the manufacturing of NCM 622 cathode material. The NCM622 precursor was mixed with Li<sub>2</sub>CO<sub>3</sub> at a Li/M (M is the sum of transition metals Ni, Co, Mn) molar ratio of 1.06, so additional extra Li<sub>2</sub>CO<sub>3</sub> is required.

**Table S6** Variation of metal concentration in recovery process.

| Solution                                               | Concentration of element/M |       |       |       |
|--------------------------------------------------------|----------------------------|-------|-------|-------|
|                                                        | Li                         | Co    | Ni    | Mn    |
| the effluent                                           | 0.101                      | 0.074 | 0.006 | 0.021 |
| concentration adjustment                               | 0.99                       | 0.072 | 0.215 | 0.071 |
| NCM622 precipitation finished                          | 0.95                       | --    | --    | --    |
| Li <sub>2</sub> CO <sub>3</sub> precipitation finished | 0.062                      | --    | --    | --    |

**Table S7**<sup>9,10</sup> A comprehensive summary of the kinetic models.

| No.             | Kinetic models                                        | Name                                            |
|-----------------|-------------------------------------------------------|-------------------------------------------------|
| <b>D1</b>       | $kt = \alpha^2$                                       | One-dimensional diffusion model                 |
| <b>D2</b>       | $kt = (1-\alpha)\ln(1-\alpha)+\alpha$                 | Two-dimensional diffusion model                 |
| <b>D3</b>       | $kt = [1-(1-\alpha)^{1/3}]^2$                         | Three-dimensional diffusion model (Jander)      |
| <b>D4</b>       | $kt = [1-(2\alpha/3)]-(1-\alpha)^{2/3}$               | Ginstling-Brounshtein model                     |
| <b>D5</b>       | $kt = [1/(1-\alpha)^{1/3}-1]^2$                       | Zhuravlev, Lesokhin and Templeman model         |
| <b>D6</b>       | $kt = [(1+\alpha)^{1/3}-1]^2$                         | Three-dimensional diffusion model (Anti-Jander) |
| <b>D7</b>       | $k\ln t = [1-(1-\alpha)^{1/3}]^2$                     | Kroger and Ziegler model                        |
| <b>D8</b>       | $kt = [1-(1-\alpha)^{1/2}]^2$                         | Cylindrical diffusion model (Jander)            |
| <b>D9</b>       | $kt = [1-(1+\alpha)^{1/2}]^2$                         | Cylindrical diffusion model (Anti-Jander)       |
| <b>D10</b>      | $kt = [1/((1-\alpha)^{1/3})]-1$                       | Dickinson and Heal model                        |
| <b>D11</b>      | $kt = [1/((1-\alpha)^{1/3})]-1+1/3\ln(1-\alpha)$      | Dickinson and Heal model                        |
| <b>D12</b>      | $kt = 1/5(1-\alpha)^{-5/3}-1/4(1-\alpha)^{-4/3}+1/20$ | Dickinson and Heal model                        |
| <b>A1</b>       | $kt = [-\ln(1-\alpha)]^{1/4}$                         | Avrami-Erofeev model                            |
| <b>A2</b>       | $kt = [-\ln(1-\alpha)]^{1/2}$                         | Avrami-Erofeev model                            |
| <b>A3</b>       | $kt = [-\ln(1-\alpha)]^{1/3}$                         | Avrami-Erofeev model                            |
| <b>A4</b>       | $kt = [-\ln(1-\alpha)]^{4/3}$                         | Avrami-Erofeev model                            |
| <b>A5</b>       | $kt = [-\ln(1-\alpha)]^{2/3}$                         | Avrami-Erofeev model                            |
| <b>A6</b>       | $\ln k+n\ln t = \ln[-\ln(1-\alpha)]$                  | Avrami-Erofeev model                            |
| <b>F0</b>       | $kt = \alpha$                                         | Zero order                                      |
| <b>F1</b>       | $kt = -\ln(1-\alpha)$                                 | First order                                     |
| <b>F2</b>       | $kt = (1-\alpha)^{-1}$                                | Second order                                    |
| <b>R2</b>       | $kt = 1-(1-\alpha)^{1/2}$                             | Interface (contracting area)                    |
| <b>R3</b>       | $kt = 1-(1-\alpha)^{1/3}$                             | Interface (contracting volume)                  |
| <b>R4</b>       | $kt = 1-(1-\alpha)^{2/3}$                             | Interface                                       |
| <b>P1 (n=2)</b> | $kt = \alpha^{1/2}$                                   | Power law ( half )                              |
| <b>P1 (n=3)</b> | $kt = \alpha^{1/3}$                                   | Power law ( third )                             |
| <b>P1 (n=4)</b> | $kt = \alpha^{1/4}$                                   | Power law ( quarter )                           |
| <b>E1</b>       | $kt = \ln \alpha$                                     | Exponential                                     |
| <b>E2</b>       | $kt = [-\ln(1-\alpha)]^2$                             | Exponential                                     |
| <b>B1</b>       | $kt = \ln[\alpha/(1-\alpha)]$                         | Prout-Tompkinsmodel                             |

**Table S8** Regression parameters of Li, Co, Ni, and Mn.

| $T$ (°C)          | Li    |       | Co     |       | Ni     |       | Mn     |       |
|-------------------|-------|-------|--------|-------|--------|-------|--------|-------|
|                   | $k$   | $R^2$ | $k$    | $R^2$ | $k$    | $R^2$ | $k$    | $R^2$ |
| 30                | 1.146 | 0.997 | 0.2832 | 0.998 | 0.2098 | 0.976 | 0.3519 | 0.991 |
| 50                | 1.965 | 0.978 | 0.3021 | 0.999 | 0.2913 | 0.983 | 0.4911 | 0.947 |
| 70                | 2.554 | 0.956 | 0.3364 | 0.999 | 0.3589 | 0.954 | 0.7198 | 0.951 |
| 90                | 5.512 | 0.986 | 0.3491 | 0.999 | 0.6236 | 0.999 | 1.210  | 0.878 |
| $-\ln k/(1000/T)$ | 2.715 | 0.953 | 0.4049 | 0.975 | 1.893  | 0.946 | 2.231  | 0.976 |

**Table S9** Lattice structure parameters of the NCM622 cathode material.

| Parameter | $a$ (Å) | $c$ (Å) | $c/a$  | $I_{003}/I_{104}$ | Ni in Li layer (%) | $R_p$ (%) | $R_{wp}$ (%) |
|-----------|---------|---------|--------|-------------------|--------------------|-----------|--------------|
| NCM622    | 2.8731  | 14.2128 | 4.9468 | 1.90              | 0.97               | 7.57      | 8.14         |

### Nitrogen cycle

$\text{NH}_3\text{H}_2\text{O}$  solution is used to adjust the pH of the effluent. After  $\text{Al}(\text{OH})_3$ , NCM622 precursor and  $\text{Li}_2\text{CO}_3$  precipitation, calcium oxide can be introduced to the effluent to release the  $\text{NH}_3$  gas with the help of reaction heat. Finally,  $\text{NH}_3$  gas was pumped in water to obtain  $\text{NH}_3\cdot\text{H}_2\text{O}$ , thereby achieving the recycling of N element.

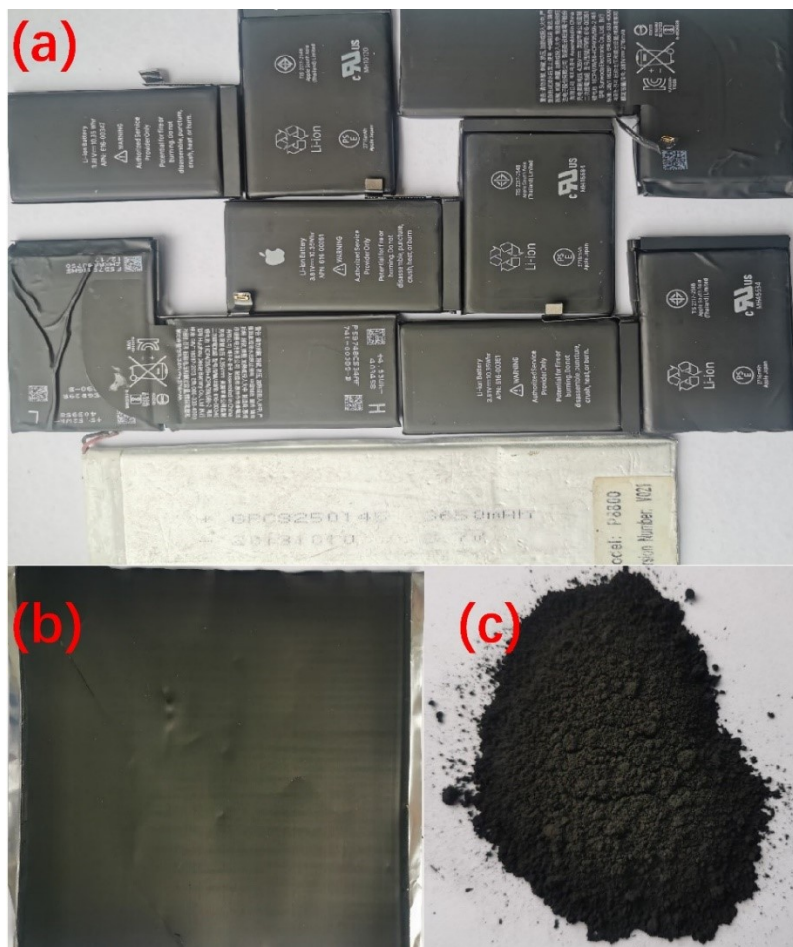

**Figure S1** EOL LIBs (a), cathode (b), and recovered cathode powders (c) from EOL LIBs.

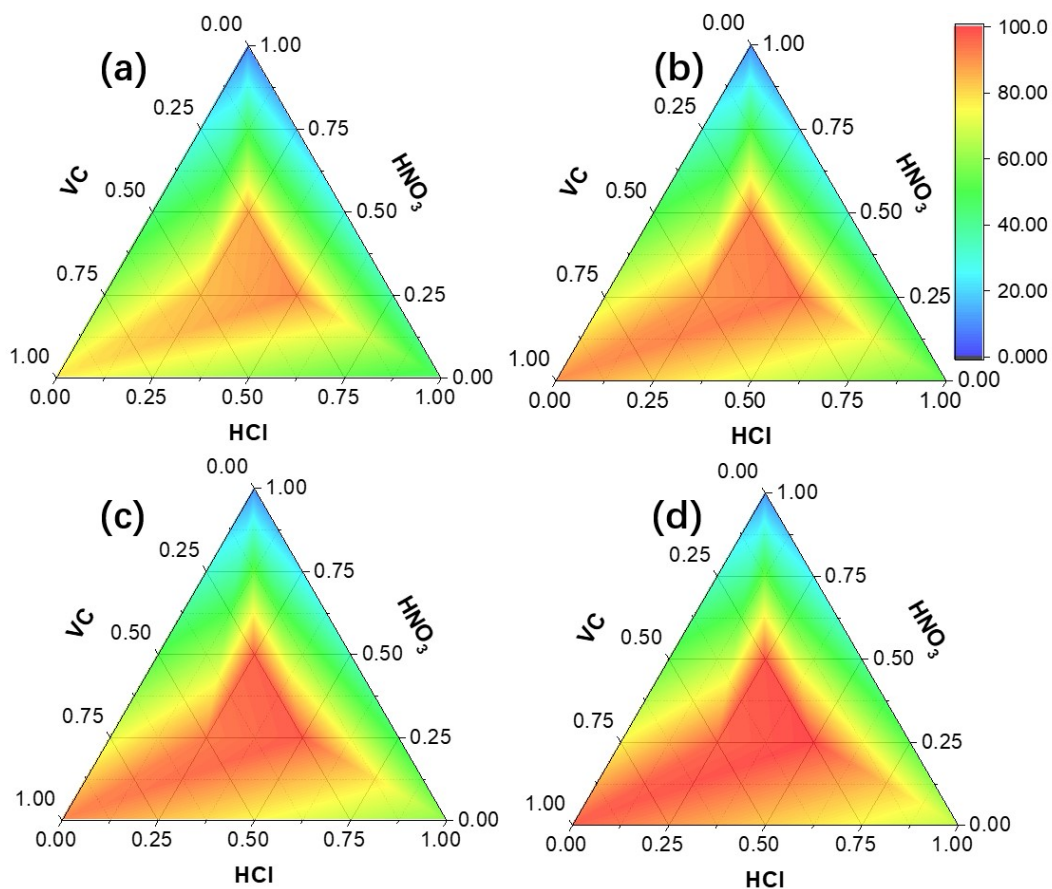

**Figure S2** Leaching kinetics of Co at 30 °C and 10 g/L solid-liquid ratio at 11min (a), 20 min (b), 30 min (c), and 40min (d) with various mixed acids ratios.

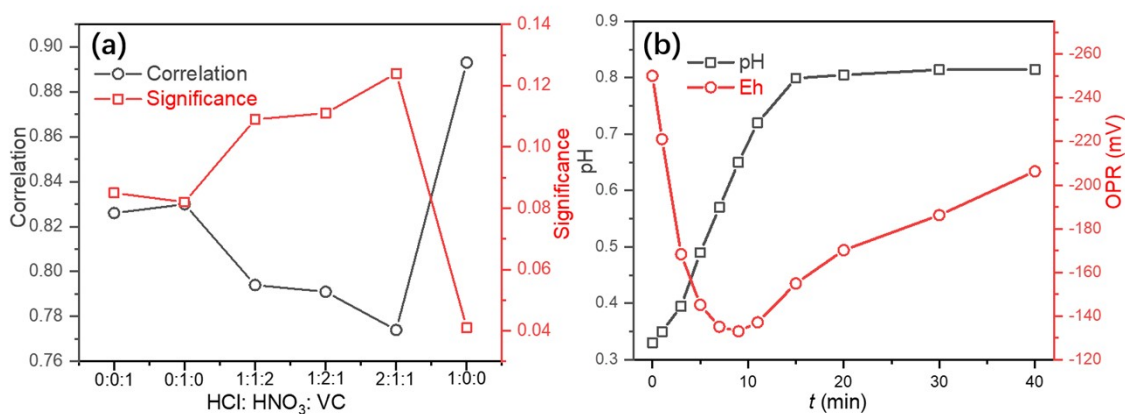

**Figure S3** Correlation and significance between mixed acids ratios and leaching efficiencies (a), Eh-pH diagram measured during the leaching process with 0.5 M HCl, 0.25 M HNO<sub>3</sub>, and 0.25 M HCl at 30 °C and 10 g/L solid-liquid ratio (b).

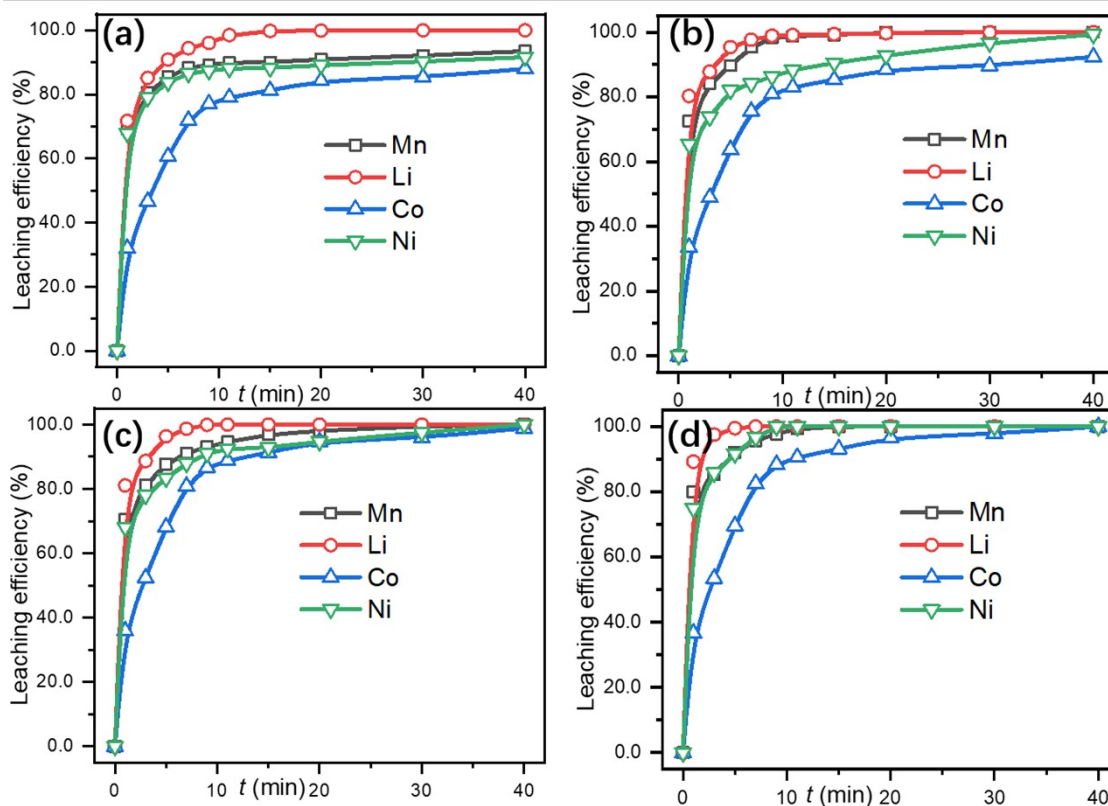

**Figure S4** Leaching kinetics of strategic metals at 30 °C (a), 50 °C (b), 70 °C (c), and 90 °C (d) at 10 g/L solid-liquid ratio, 0.5 M HCl, 0.25 M HNO<sub>3</sub> and 0.25 M VC.

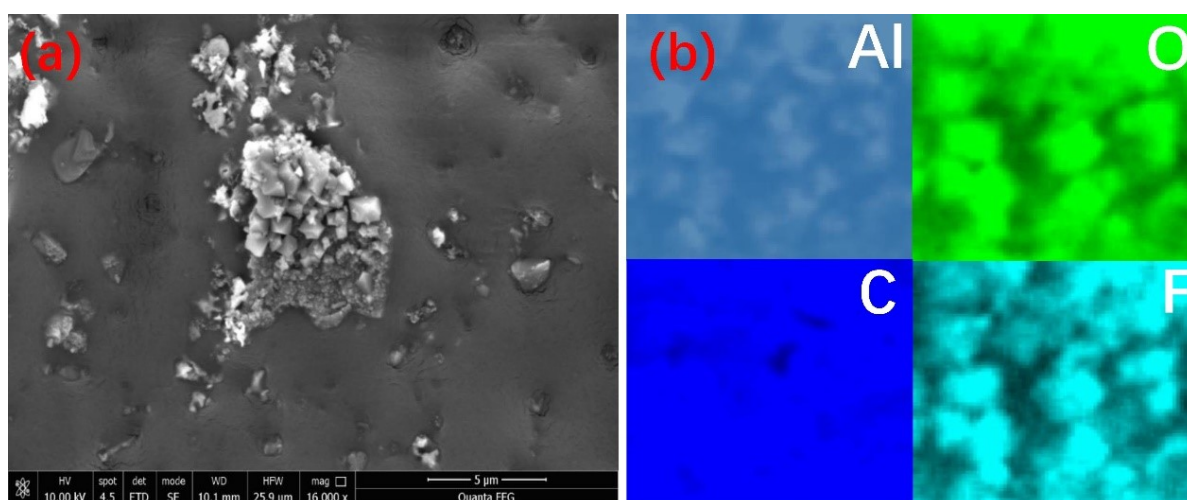

**Figure S5** SEM (a) and EDX (b) images of the leached residual at 90 °C with optimal acids ratios.



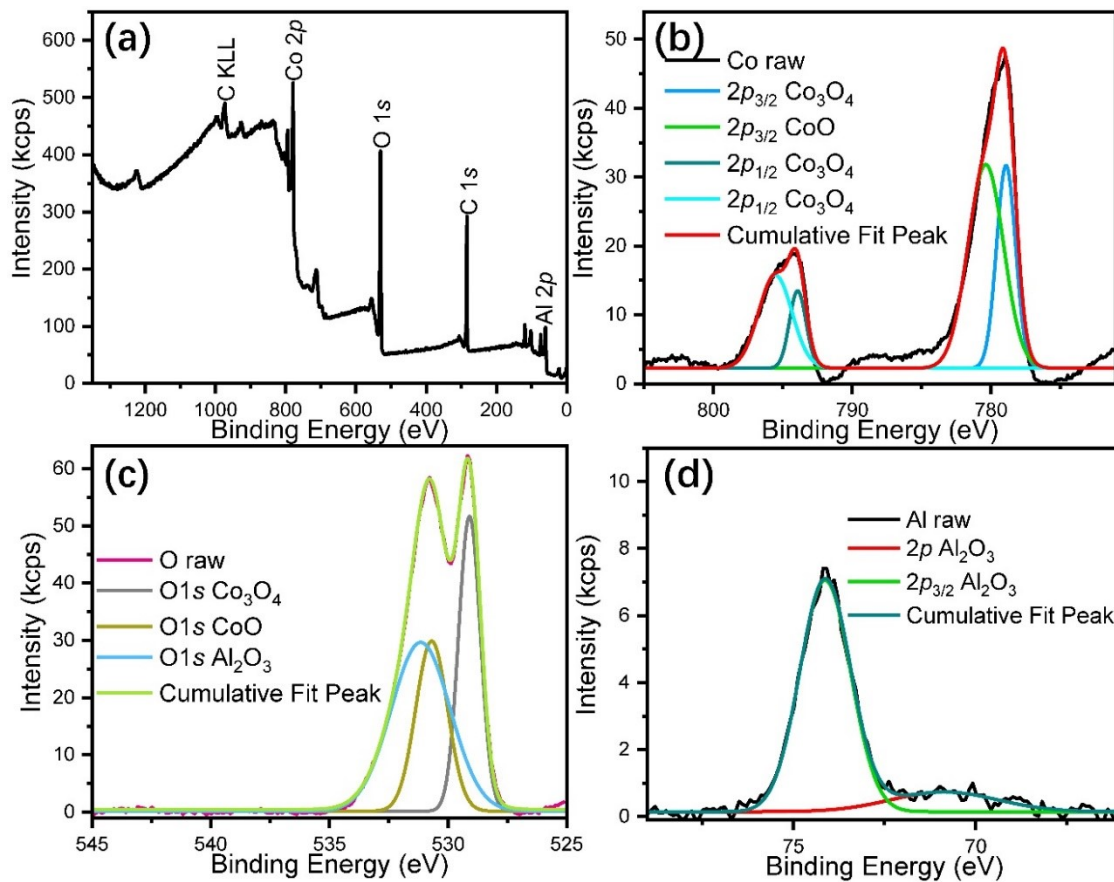

**Figure S6** XPS survey of the leached residual at 30 °C (a) and the deconvoluted high-resolution XPS curves of Co (b), O (c), and Al (d).

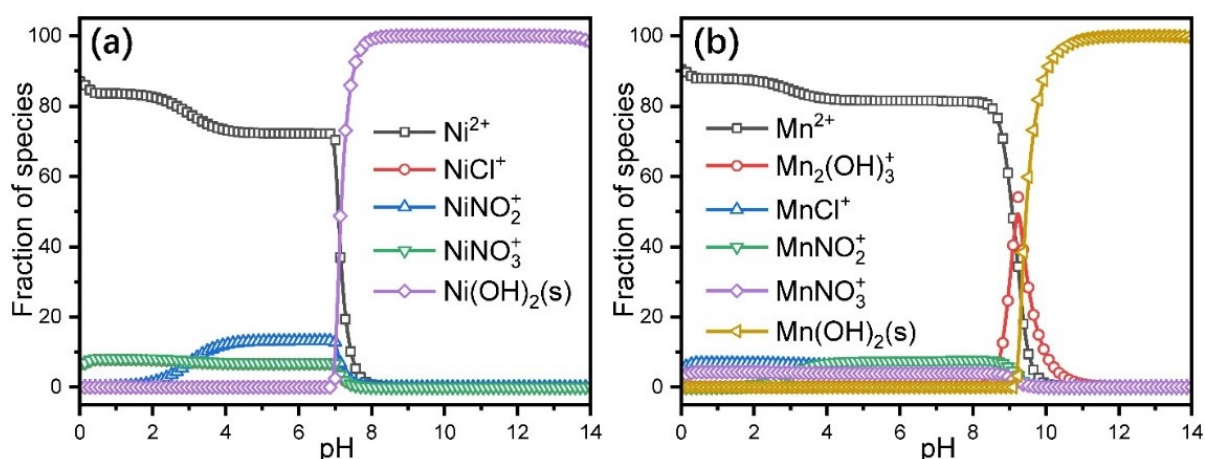

**Figure S7** Thermodynamic calculations of Ni-containing (a) and Mn-containing (b) species at 30°C.

S10

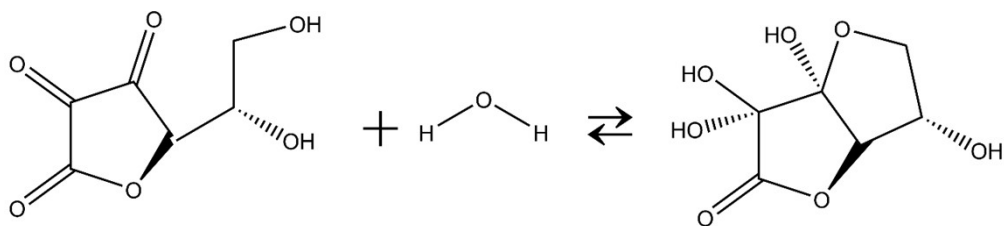

**Figure S8** Reactions of DHA hydrate to form Bi-DHA.

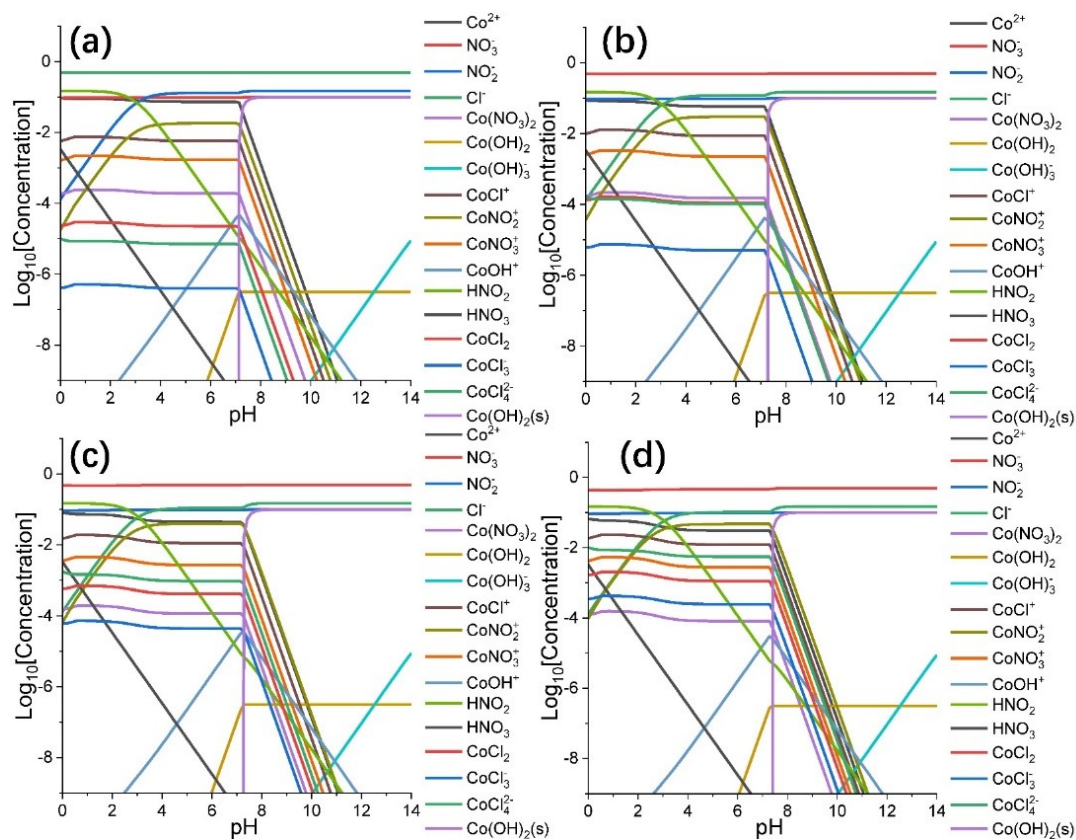

**Figure S9** Thermodynamic calculated species distributions of mixed acids system at 30 °C (a), 50 °C (b), 70 °C (c) and 90 °C (d).

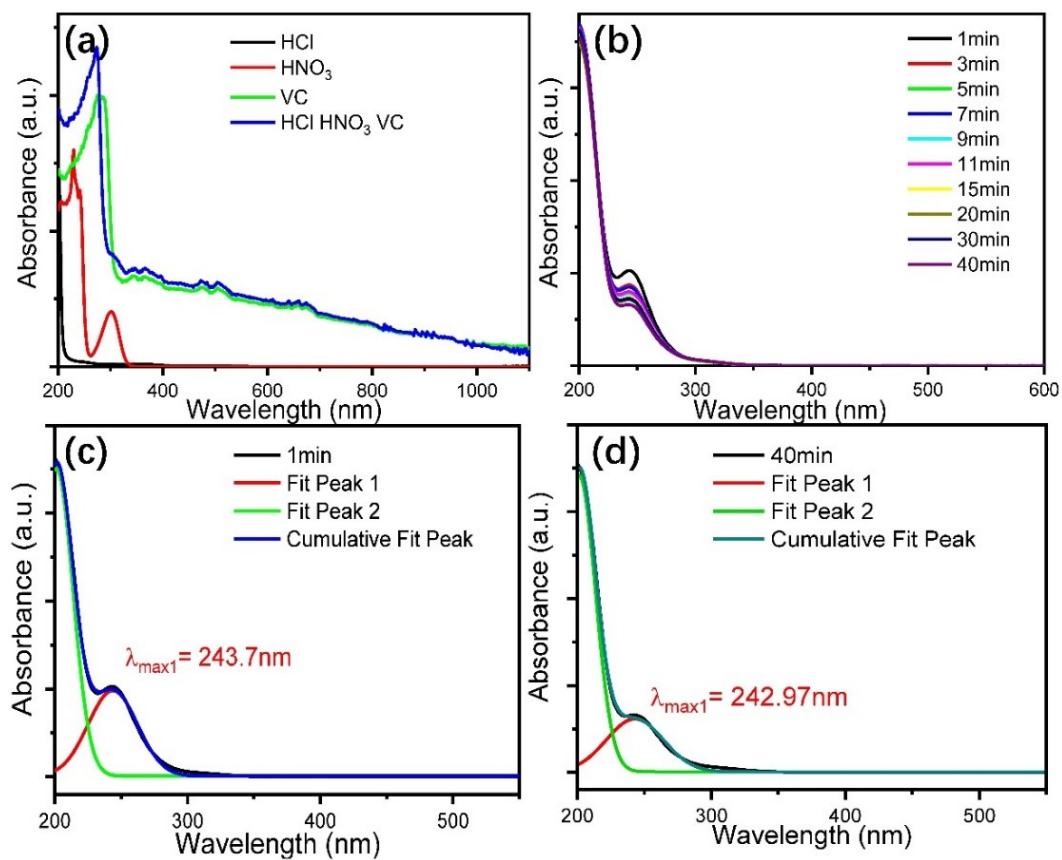

**Figure S10** UV-vis spectrum of mixed acids at 0min (a), 1~40 min (b), and deconvoluted absorbance curves at 1 min (c) and 40 min (d).

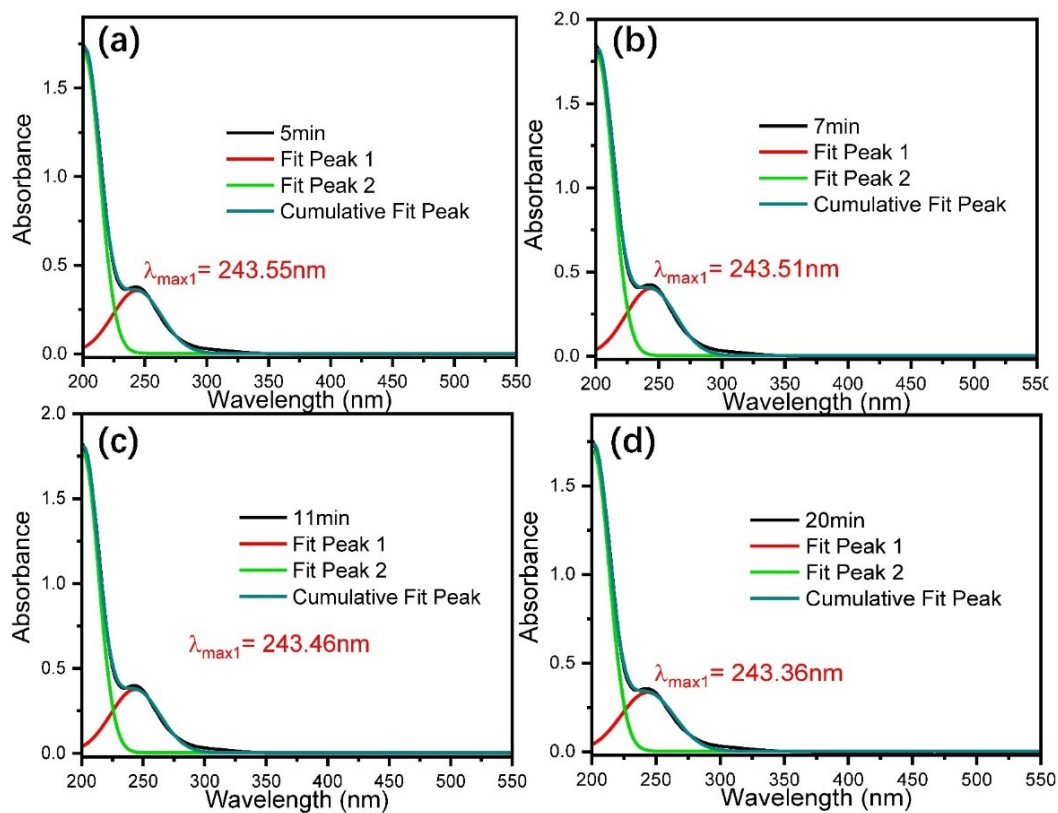

**Figure S11** Deconvoluted UV-vis absorbance in mixed acids system at 5 min (a), 7 min (b), 11 min (c), and 20 min (d).

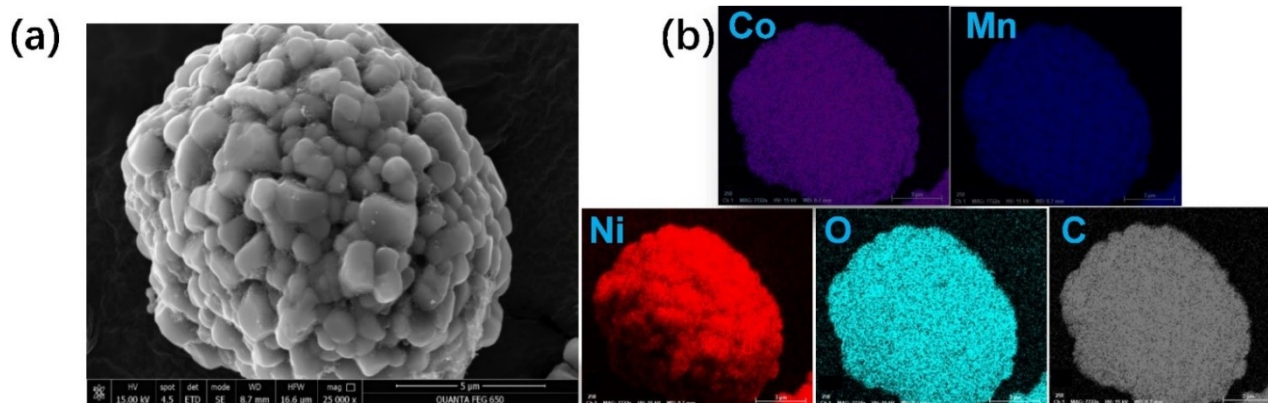

**Figure S12** SEM (c), and EDX (d) images of the as-recovered NCM622 precursor.

**References**

- [1] E. Gillet, B. Ealet, *Surf. Sci.*, 1992, **273**, 427-436.
- [2] C. D. Wagner, D. E. Passoja, H. F. Hillery, et al., *Vac. Sci. Technol.*, 1982, **21**, 933-944.
- [3] Haber, L. Ungier, J. *Electron Spectrosc. Relat. Phenom.*, 1977, **12**, 305-312.
- [4] C. V. Schenck, J. G. Dillard, J. W. Murray, *J. Colloid Interface Sci.*, 1983, **95**, 398-409.
- [5] G. Tyuliev, S. Angelov, *Appl. Surf. Sci.*, 1988, **32**, 381-391.
- [6] B.J. Tan, K.J. Klabunde, P.M.A. Sherwood, *J. Am. Chem. Soc.*, 1991, **113**, 855-861.
- [7] P. Porta, R. Dragone, G. Fierro, et al., *Chem. Soc. Faraday Trans., Faraday Transactions*, 1992, **88**, 311-319.
- [8] V. I.Nefedov, *J. Electron Spectrosc. Relat. Phenom.*, 1982, **25**, 29-47.
- [9] C.F. Dickinson, G.R. Heal, *Thermochimica Acta*, 1999, **340-341**, 89-103.
- [10] J. H. Sharp, G. W. Brindley, B. N. N. Achar, *J. Am. Ceram. Soc.*, 1966, **49**, 379-382.
